# Supplementary material for: In Vitro Antibacterial Activity and in Silico Analysis of the Bioactivity of Major Compounds Obtained from the Essential Oil of Virola surinamensis Warb (Myristicaceae)
Source: Hindawi journal article supplement (doi:10.1155/2022/5275805), 2022-10-12
Supplement: f1 [file 5275805.f1.pdf]

S1 - Targethunter analysis of the major compounds of *Virola surinamensis essential* oil.

| <b><math>\alpha</math>-Pinene</b> |                         |                                              |                                                                |                   |                                    |                    |                   |
|-----------------------------------|-------------------------|----------------------------------------------|----------------------------------------------------------------|-------------------|------------------------------------|--------------------|-------------------|
| ID                                | ChEMBL Similar Compound | Name Similar Compound                        | SMILES Similar Compound                                        | DOI Articles      | Bioactivity value (IC50, Ki, etc)* | Antibacterial test | Bacterial species |
| 1                                 | CHEMBL1236329           | (+)-alpha - Pinene                           | <chem>CC1=CC[C@@H]2C[C@H]1C2(C)C</chem>                        | 10.1021/jf034936d | 20,80%                             | Gi                 | <i>S. aureus</i>  |
| 2                                 | CHEMBL1689085           | (1R,2E,4R,7E,11S,12R)-2,7,18-Dolabellatriene | <chem>C[C@@H]1CCC=C(CC[C@H]2[C@@H](C[C@@]2/C=C1)C=C(C)C</chem> | 10.1021/np1006586 | 128 µg/ml                          | MIC                | <i>S. aureus</i>  |

| <b><math>\beta</math>-Maaliene</b> |                         |                                                                                                                                         |                                                                                                         |                      |                                    |                    |                        |
|------------------------------------|-------------------------|-----------------------------------------------------------------------------------------------------------------------------------------|---------------------------------------------------------------------------------------------------------|----------------------|------------------------------------|--------------------|------------------------|
| ID                                 | ChEMBL Similar Compound | Name Similar Compound                                                                                                                   | SMILES Similar Compound                                                                                 | DOI Articles         | Bioactivity value (IC50, Ki, etc)* | Antibacterial test | Bacterial species      |
| 1                                  | CHEMBL1171157           | (4S,4aS,6aR,6bS,8aR,11R,12S,12aR,14aR,14bS)-4,6a,6b,8a,11,12,14b-heptamethyl-1,2,3,4,4a,5,6,7,8,9,10,11,12,12a,14,14a-hexadecahydricene | <chem>C[C@H]1CCC[C@]2([C@H]1CC[C@@]3([C@@H]2CC=C4[C@]3(CC[C@@]5([C@H]4[C@H]([C@@H](CC5)C)C)C)C)C</chem> | 10.1016/j.bmcl.2010. | 100 µg/ml                          | MIC                | <i>M. tuberculosis</i> |

| <b><math>\beta</math>-Pinene</b> |                         |                       |                                                                |                   |                                    |                    |                   |
|----------------------------------|-------------------------|-----------------------|----------------------------------------------------------------|-------------------|------------------------------------|--------------------|-------------------|
| ID                               | ChEMBL Similar Compound | Name Similar Compound | SMILES Similar Compound                                        | Articles          | Bioactivity value (IC50, Ki, etc)* | Antibacterial test | Bacterial species |
| 1                                | CHEMBL2269085           | (+)-beta - Pinene     | <chem>CC1([C@@H]2CCC(=C)[C@H]1C2)C</chem>                      | 10.1021/jf034936d | 17,60%                             | Gi                 | <i>S. aureus</i>  |
| 2                                | CHEMBL2269083           | (+)-Aromadendrene     | <chem>C[C@@H]1CC[C@@H]2[C@@H]1[C@H]3[C@H](C3(C)C)CCC2=C</chem> | 10.1021/jf034936d | 24,20%                             | Gi                 | <i>E. coli</i>    |

| <b>δ-Selinene</b> |                         |                                                                                                             |                                                                                            |                      |                                    |                    |                        |
|-------------------|-------------------------|-------------------------------------------------------------------------------------------------------------|--------------------------------------------------------------------------------------------|----------------------|------------------------------------|--------------------|------------------------|
| ID                | ChEMBL Similar Compound | Name Similar Compound                                                                                       | SMILES Similar Compound                                                                    | DOI Articles         | Bioactivity value (IC50, Ki, etc)* | Antibacterial test | Bacterial species      |
| 1                 | CHEMBL1171156           | Stigmasta-3,5-diene                                                                                         | <chem>CCC(CC[C@@H](C)[C@H]1CC[C@@H]2[C@@]1(CC[C@H]3[C@H]2CC=C4[C@@]3(CCC=C4)C)C(C)C</chem> | 10.1016/j.bmcl.2010. | 100 µg/ml                          | MIC                | <i>M. tuberculosis</i> |
| <b>Limonene</b>   |                         |                                                                                                             |                                                                                            |                      |                                    |                    |                        |
| ID                | ChEMBL Similar Compound | Name Similar Compound                                                                                       | SMILES Similar Compound                                                                    | DOI Articles         | Bioactivity value (IC50, Ki, etc)* | Antibacterial test | Bacterial species      |
| 1                 | CHEMBL1689074           | (1S,3aR,5E,12aS)-3a,6,10-trimethyl-1-prop-1-en-2-yl-2,3,4,7,8,11,12,12a-octahydro-1H-cyclopenta[11]annulene | <chem>CC1=CCC/C(=C/C[C@]2(CC[C@@H]([C@@H]2CC1)C(=C)C)C)/C</chem>                           | 10.1021/np1006586    | 64 µg/ml                           | MIC                | <i>S. aureus</i>       |
| 2                 | CHEMBL1689085           | (1R,2E,4R,7E,11S,12R)-2,7,18-Dolabellatriene                                                                | <chem>C[C@@H]1CCC=C(CC[C@H]2[C@@H](CC[C@@]2/C=C1)C)C(=C)C</chem>                           | 10.1021/np1006586    | >128 µg/ml                         | MIC                | <i>S. aureus</i>       |
| <b>Myrcene</b>    |                         |                                                                                                             |                                                                                            |                      |                                    |                    |                        |
| ID                | ChEMBL Similar Compound | Name Similar Compound                                                                                       | SMILES Similar Compound                                                                    | DOI Articles         | Bioactivity value (IC50, Ki, etc)* | Antibacterial test | Bacterial species      |
| 1                 | CHEMBL458402            | Squalene                                                                                                    | <chem>CC(=CCC/C(=C/CC/C(=C/CC/C=C(/CC/C=C(/CCC=C(C)C)\C)\C)/C)/C</chem>                    | 10.1021/np800082e    | 100 µg/ml                          | MIC                | <i>M. tuberculosis</i> |

\*All bioactivity values refer to the inhibition tests against the bacterial species
